# Supplementary material for: Hierarchical superstructures of norbornene-based polymers depending on dendronized side-chains
Source: Royal Society of Chemistry journal article supplement (doi:10.1039/c6py01286h), 2016-01-01
Supplement: c6py01286h1.pdf [file c6py01286h1.pdf]

Supporting Information for

## Hierarchical Superstructures of the Norbornene-Based Polymers Depending on the Dendronized Side-Chains

Dae-Yoon Kim,<sup>a</sup> Dong-Gue Kang,<sup>a</sup> Suyong Shin,<sup>b</sup> Tae-Lim Choi,<sup>b,\*</sup> and  
Kwang-Un Jeong<sup>a,\*</sup>

<sup>a</sup> Department of Polymer-Nano Science and Technology, Chonbuk National University, Jeonju, 54896, Korea.

<sup>b</sup> Department of Chemistry, Seoul National University, Seoul 08826, Korea.

\* E-mail: kujeong@jbnu.ac.kr and tlc@snu.ac.kr

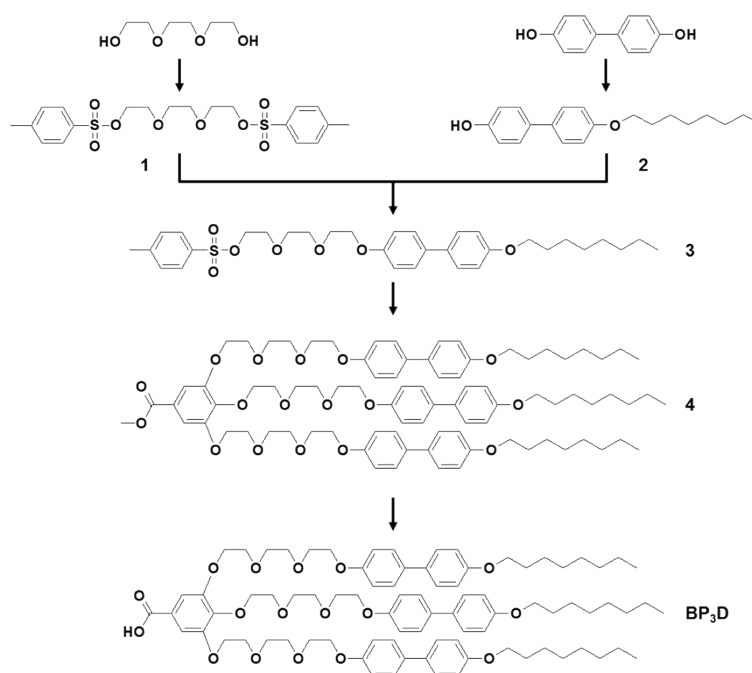

**Figure S1.** Synthesis of BP<sub>3</sub>D.

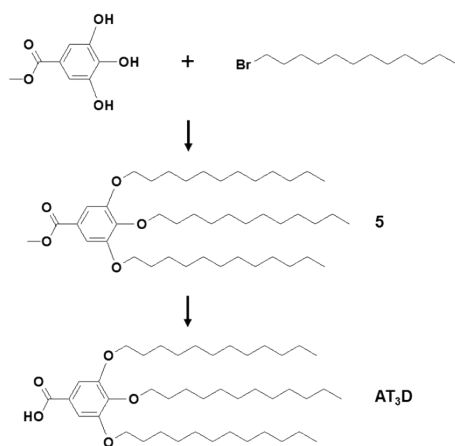

**Figure S2.** Synthesis of AT<sub>3</sub>D.

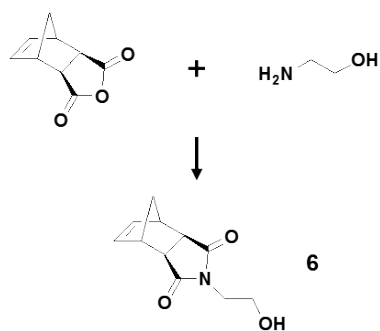

**Figure S3.** Synthesis of norbornene derivatives.

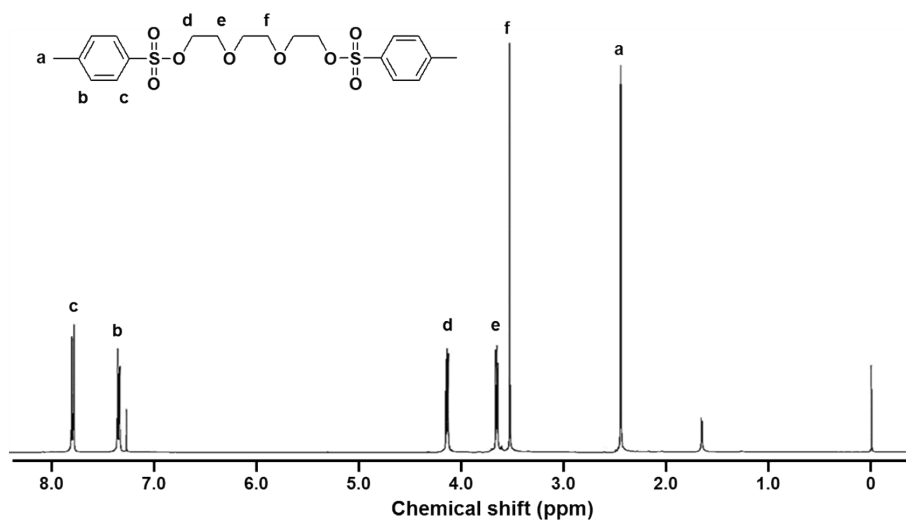

**Figure S4.** <sup>1</sup>H NMR spectrum of compound 1.

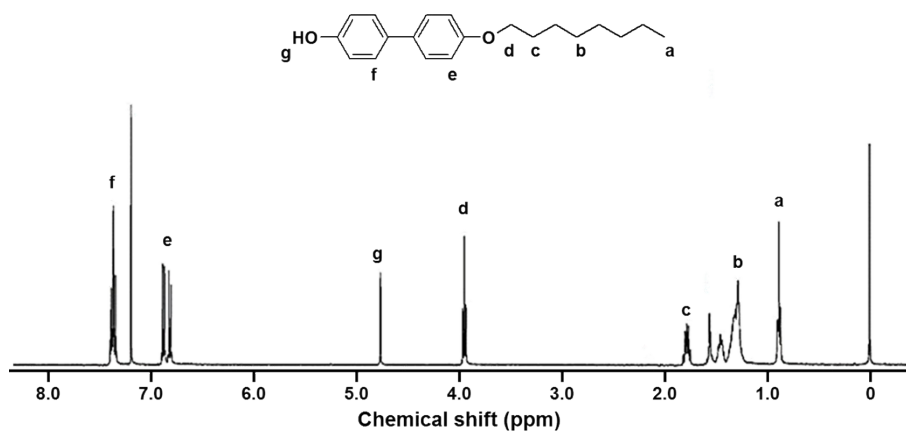

**Figure S5.** <sup>1</sup>H NMR spectrum of compound 2.

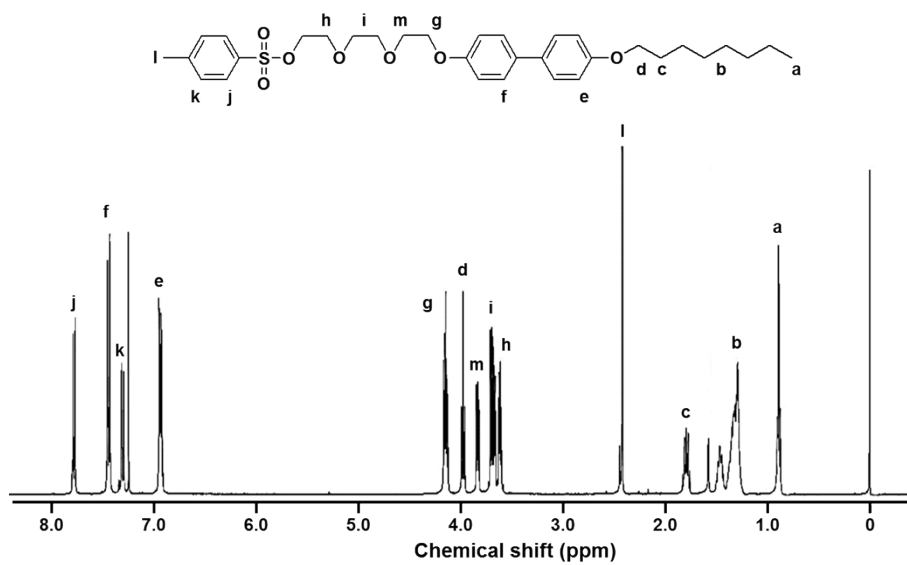

**Figure S6.** <sup>1</sup>H NMR spectrum of compound 3.

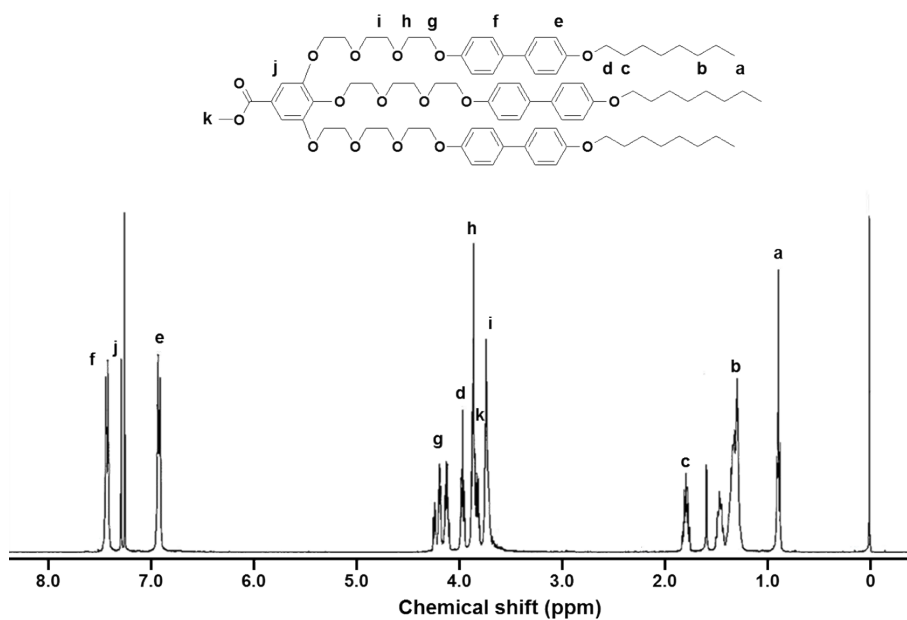

**Figure S7.** <sup>1</sup>H NMR spectrum of compound 4.

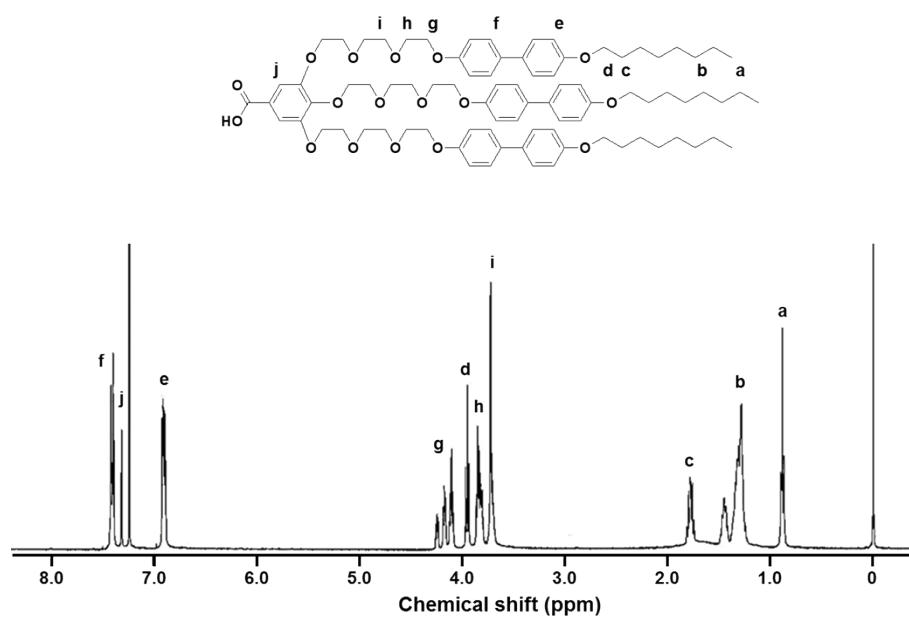

**Figure S8.** <sup>1</sup>H NMR spectrum of BP<sub>3</sub>D.

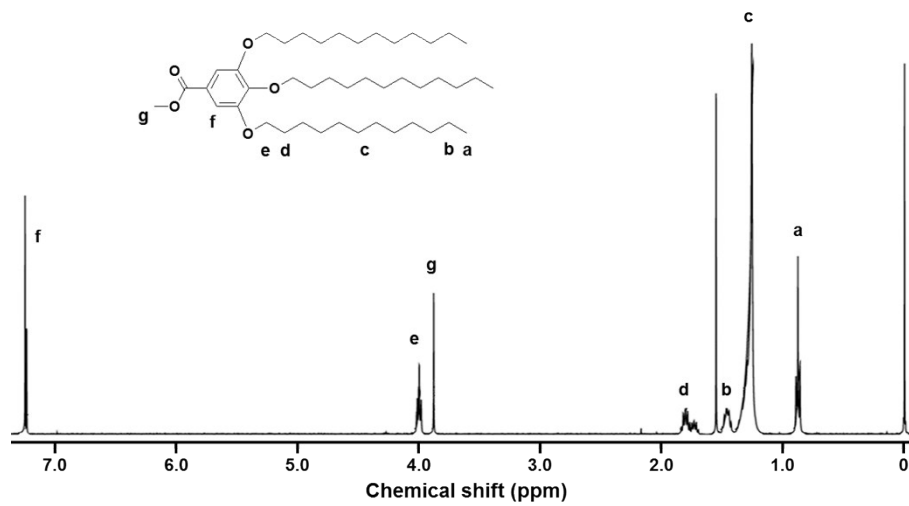

**Figure S9.** <sup>1</sup>H NMR spectrum of compound 5.

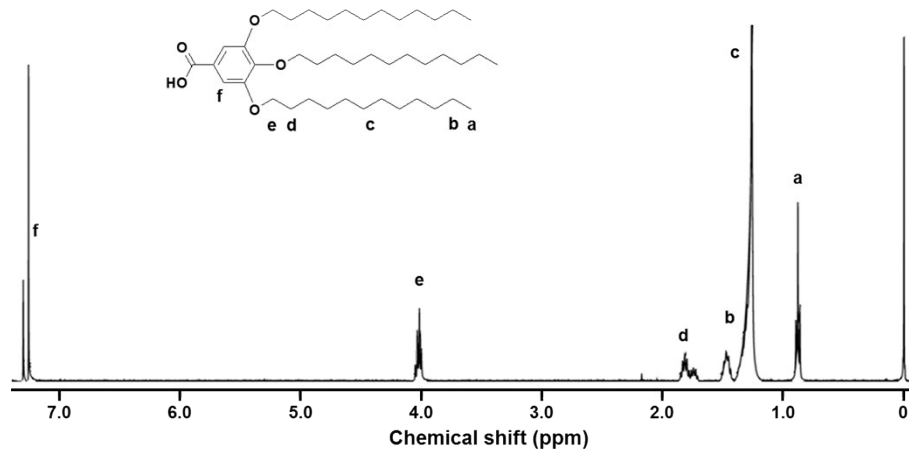

**Figure S10.** <sup>1</sup>H NMR spectrum of AT<sub>3</sub>D.

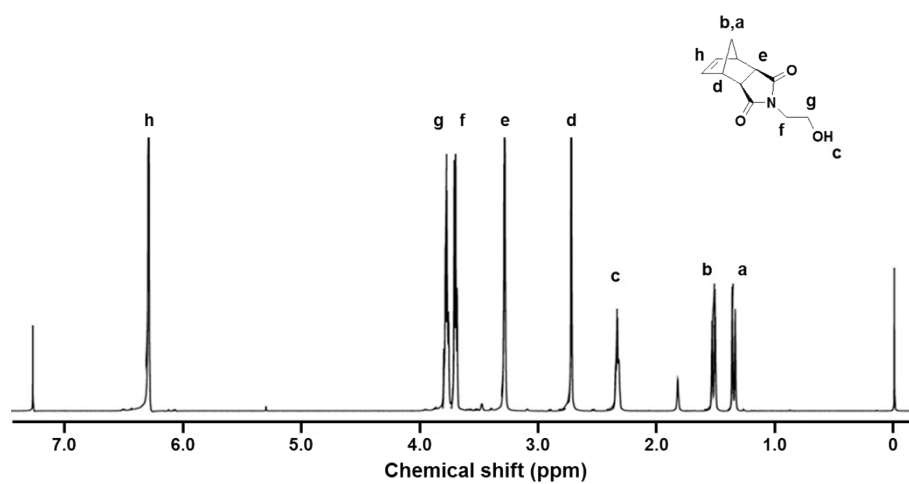

**Figure S11.** <sup>1</sup>H NMR spectrum of compound 6.

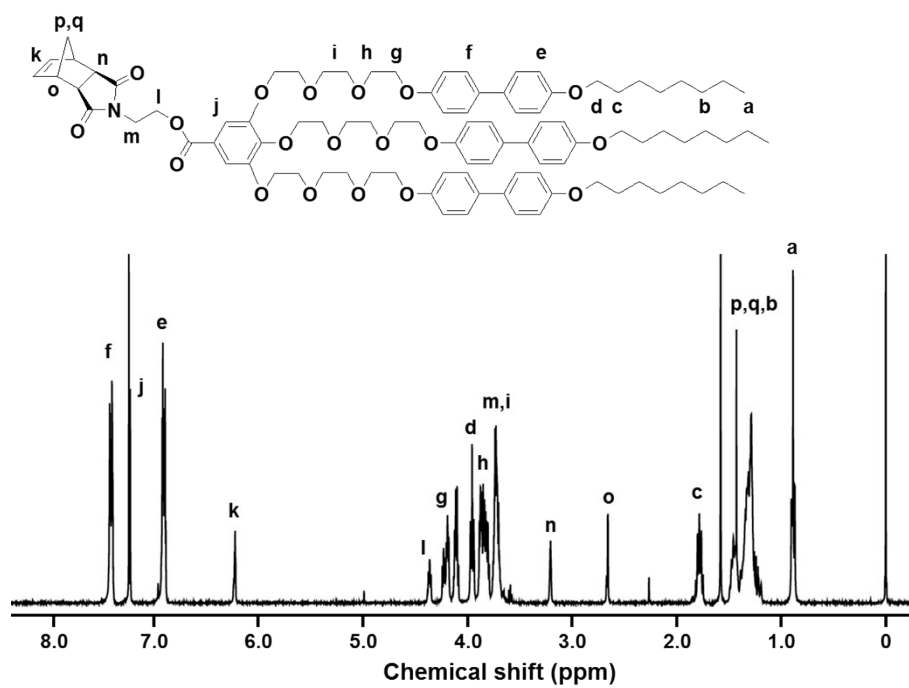

Figure S12. <sup>1</sup>H NMR spectrum of BP<sub>3</sub>M.

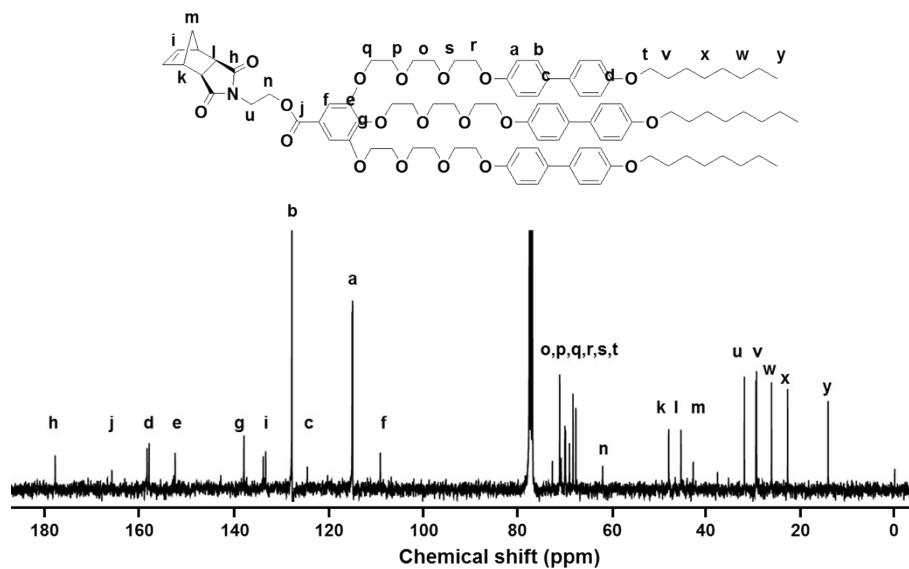

Figure S13. <sup>13</sup>C NMR spectrum of BP<sub>3</sub>M.

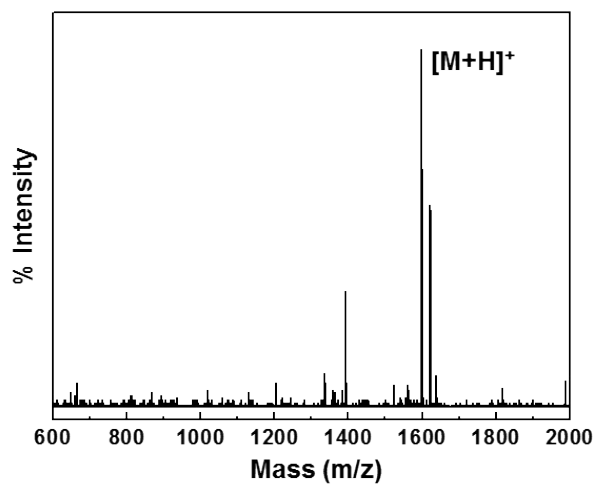

**Figure S14.** MALDI-ToF mass spectrum of BP<sub>3</sub>M.

|   | Experimental Content (%) | Calculated Content (%) |
|---|--------------------------|------------------------|
|   | 71.75                    |                        |
| C | 71.96                    | 72.20                  |
|   | 72.08                    |                        |
|   | 7.72                     |                        |
| H | 7.33                     | 7.89                   |
|   | 7.87                     |                        |
|   | 0.76                     |                        |
| N | 0.79                     | 0.88                   |
|   | 0.82                     |                        |

**Figure S15.** Elemental analysis of BP<sub>3</sub>M.



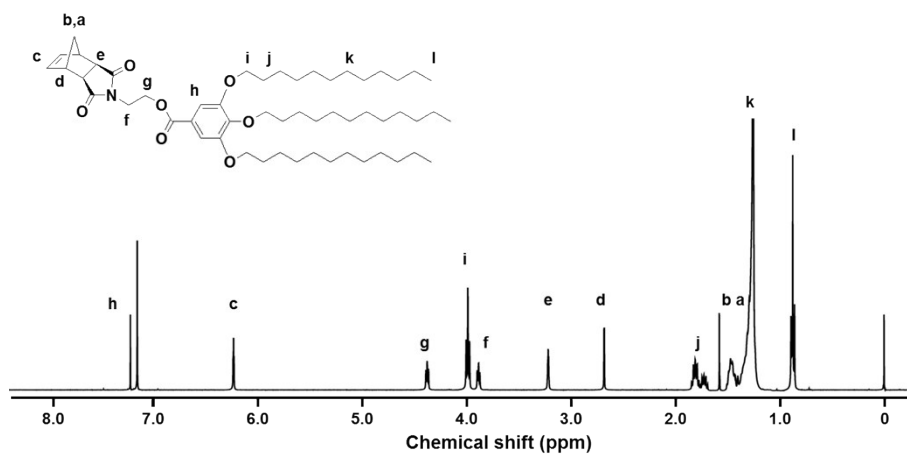

**Figure S16.** <sup>1</sup>H NMR spectrum of AT<sub>3</sub>M.

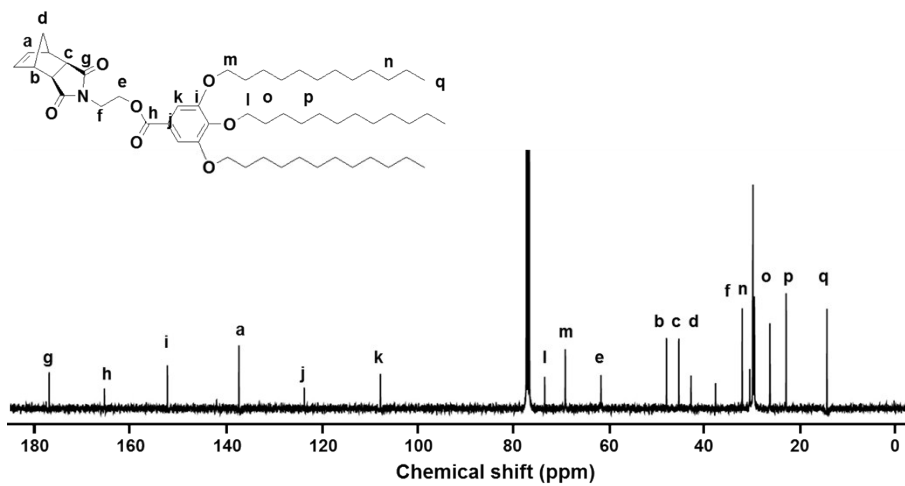

**Figure S17.** <sup>13</sup>C NMR spectrum of AT<sub>3</sub>M.

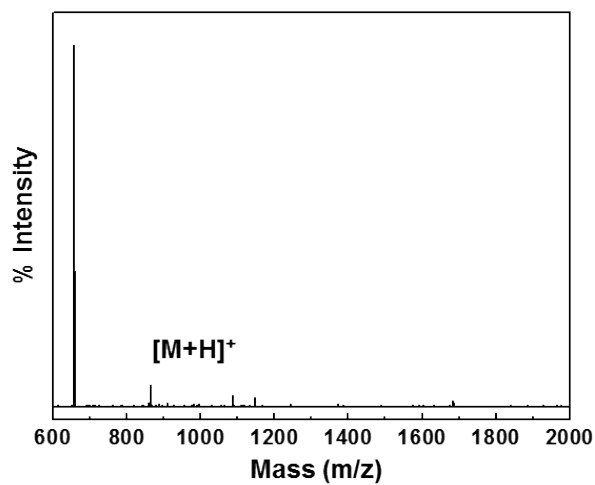

**Figure S18.** MALDI-ToF mass spectrum of AT<sub>3</sub>M.

|       | Experimental Content (%) | Calculated Content (%) |
|-------|--------------------------|------------------------|
|       | 74.89                    |                        |
| C     | 74.94                    | 75.04                  |
|       | 75.01                    |                        |
| ----- |                          |                        |
|       | 10.17                    |                        |
| H     | 10.22                    | 10.38                  |
|       | 10.31                    |                        |
| ----- |                          |                        |
|       | 1.39                     |                        |
| N     | 1.42                     | 1.62                   |
|       | 1.54                     |                        |

**Figure S19.** Elemental analysis of AT<sub>3</sub>M.

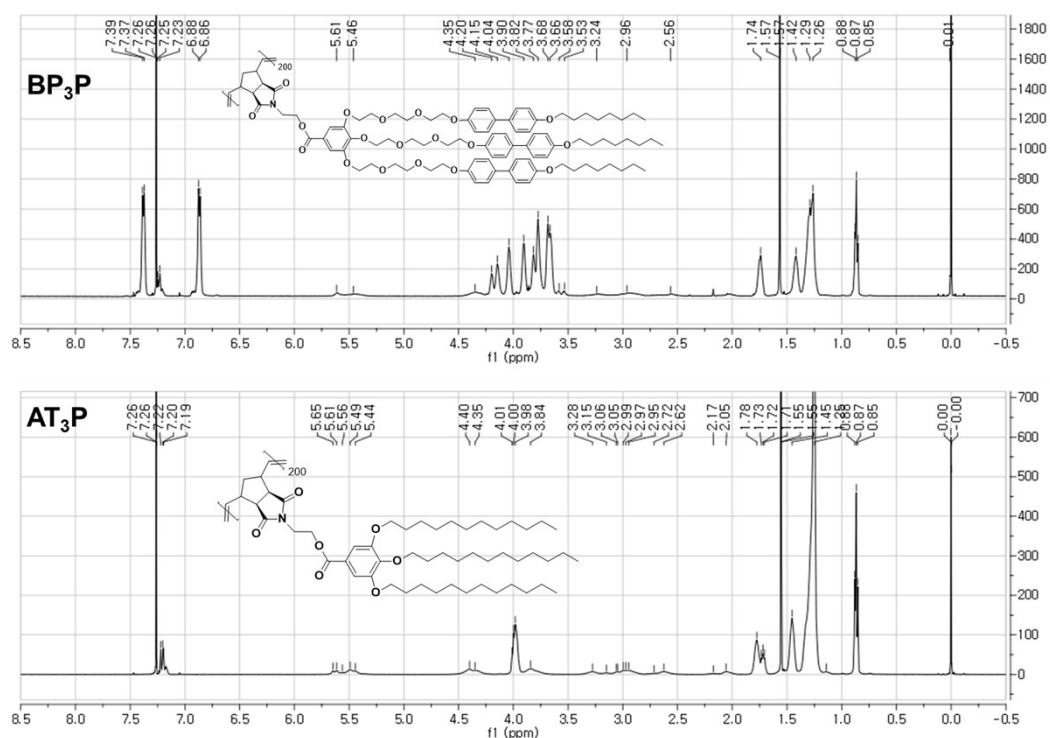

Figure S20. <sup>1</sup>H NMR spectrum of BP<sub>3</sub>P and AT<sub>3</sub>P.

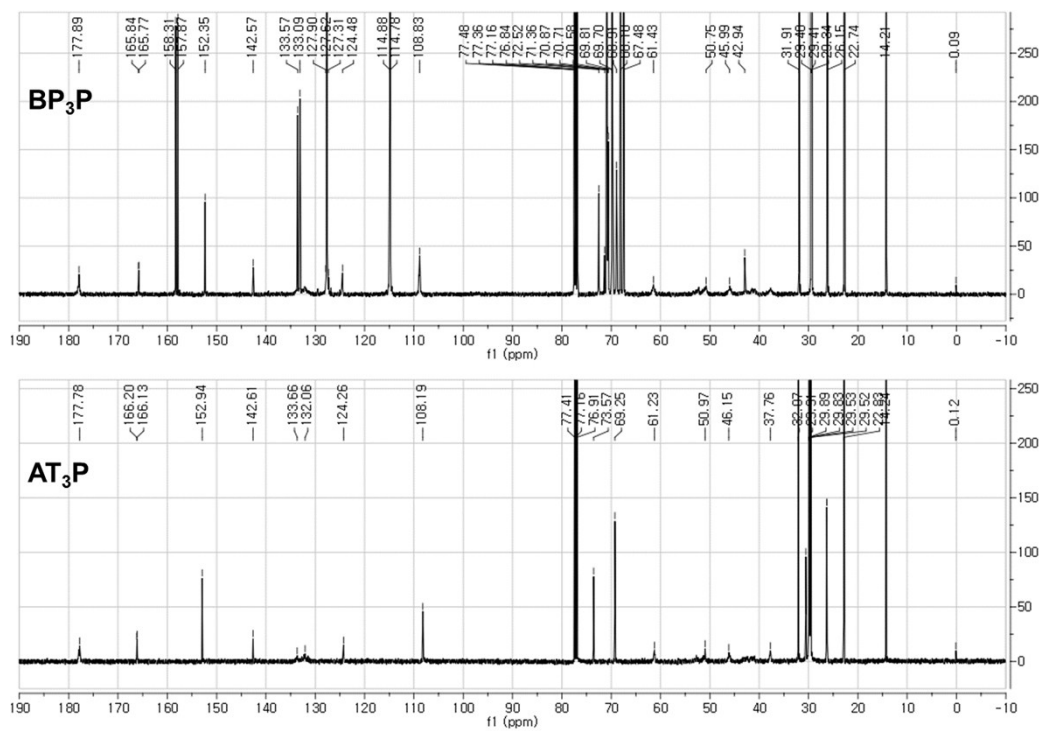

Figure S21. <sup>13</sup>C NMR spectrum of BP<sub>3</sub>P and AT<sub>3</sub>P.

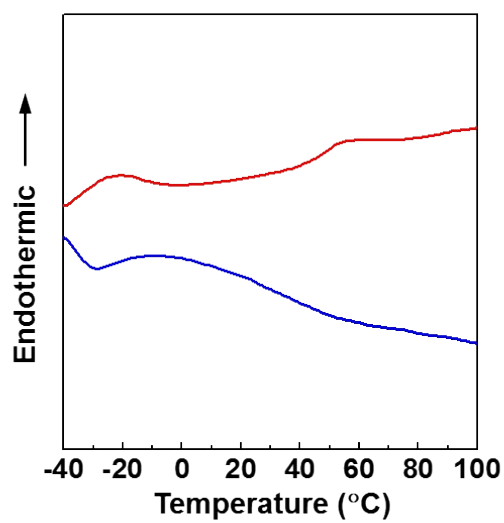

**Figure S22.** DSC thermograms of AT<sub>3</sub>P during heating and subsequent cooling processes at 2.5 °C/min.

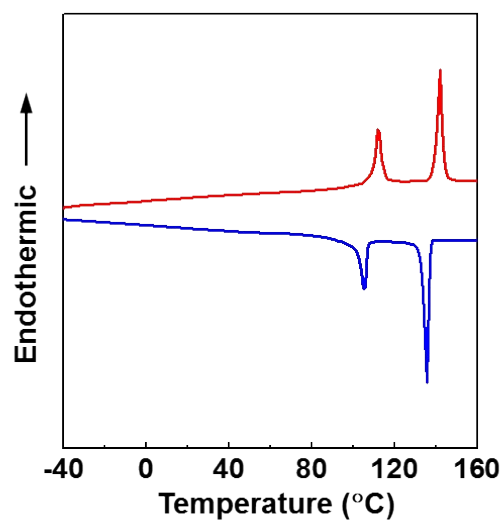

**Figure S23.** DSC thermograms of BP<sub>3</sub>P during heating and subsequent cooling processes at 2.5 °C/min.

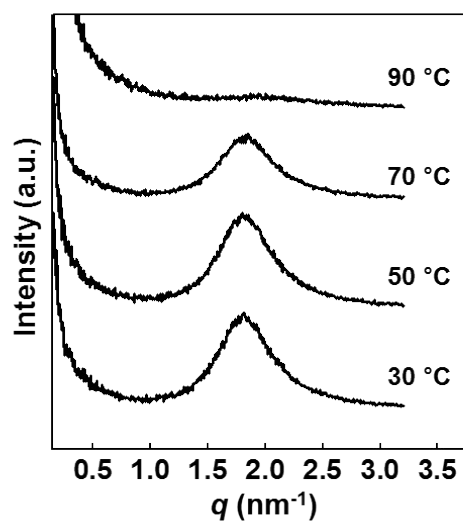

**Figure S24.** 1D SAXS pattern of the AT<sub>3</sub>P at different temperatures.

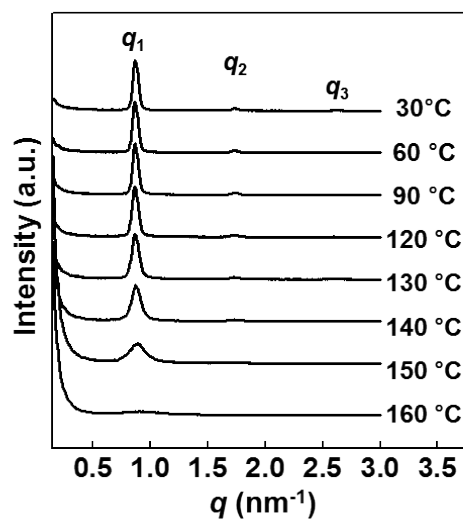

**Figure S25.** 1D SAXS pattern of the BP<sub>3</sub>P at different temperatures.
